# Supplementary material
Source: publisher figshare collection journal article supplement (https://acs.figshare.com/ndownloader/files/4226212)
Supplement: Supplementary file 1 [file 4226212]

## **Supporting Information**

# **Probing the Dynamics of a His73-heme Alkaline Transition in a Destabilized Variant of Yeast Iso-1-Cytochrome *c* with Conformationally Gated Electron Transfer Methods**

Swati Bandi and Bruce E. Bowler\*

Department of Chemistry and Biochemistry and Center for Biomolecular Structure and  
Dynamics

The University of Montana, Missoula, Montana 59812

### A. pH titrations as a function of gdnHCl concentration

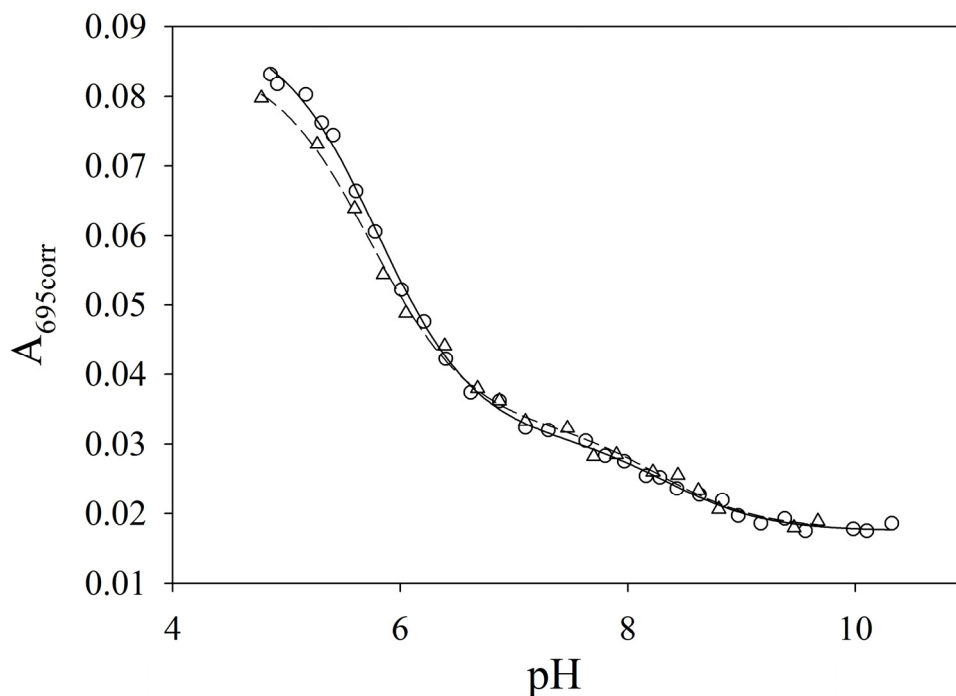

**Figure S1.** Plot of  $A_{695\text{corr}}$  versus pH for AcH73 iso-1-cytochrome *c* at room temperature ( $22 \pm 1$  °C) in 0.1 M NaCl in the presence of 0.2 M gdnHCl showing forward ( $\circ$ ) and backward ( $\Delta$ ) titration curves. The solid curves are fits to eq 1 as described in the Experimental Section.

**Table S1.** Thermodynamic parameters from pH titration in 0.1 M NaCl at  $22 \pm 1$  °C for the AcH73 variant of iso-1-cytochrome *c*.<sup>a</sup>

| [gdnHCl] (M)   | $pK_{C1}$        | $pK_{H1}$       | $pK_{C2}$        |
|----------------|------------------|-----------------|------------------|
| 0.1 (Forward)  | $-0.44 \pm 0.08$ | $6.29 \pm 0.17$ | $-2.92 \pm 0.50$ |
| 0.1 (Backward) | $-0.66 \pm 0.18$ | $6.21 \pm 0.31$ | $-3.04 \pm 0.43$ |
| 0.2 (Forward)  | $-0.74 \pm 0.20$ | $6.28 \pm 0.24$ | $-3.33 \pm 0.24$ |
| 0.2 (Backward) | $-0.91 \pm 0.08$ | $6.19 \pm 0.26$ | $-3.51 \pm 0.27$ |
| 0.3 (Forward)  | $-0.84 \pm 0.07$ | $6.37 \pm 0.18$ | $-3.32 \pm 0.09$ |
| 0.3 (Backward) | $-0.99 \pm 0.22$ | $6.11 \pm 0.16$ | $-3.63 \pm 0.24$ |

<sup>a</sup> Parameters are the average and standard deviation from three trials for fits to eq 1 in the Experimental Section.

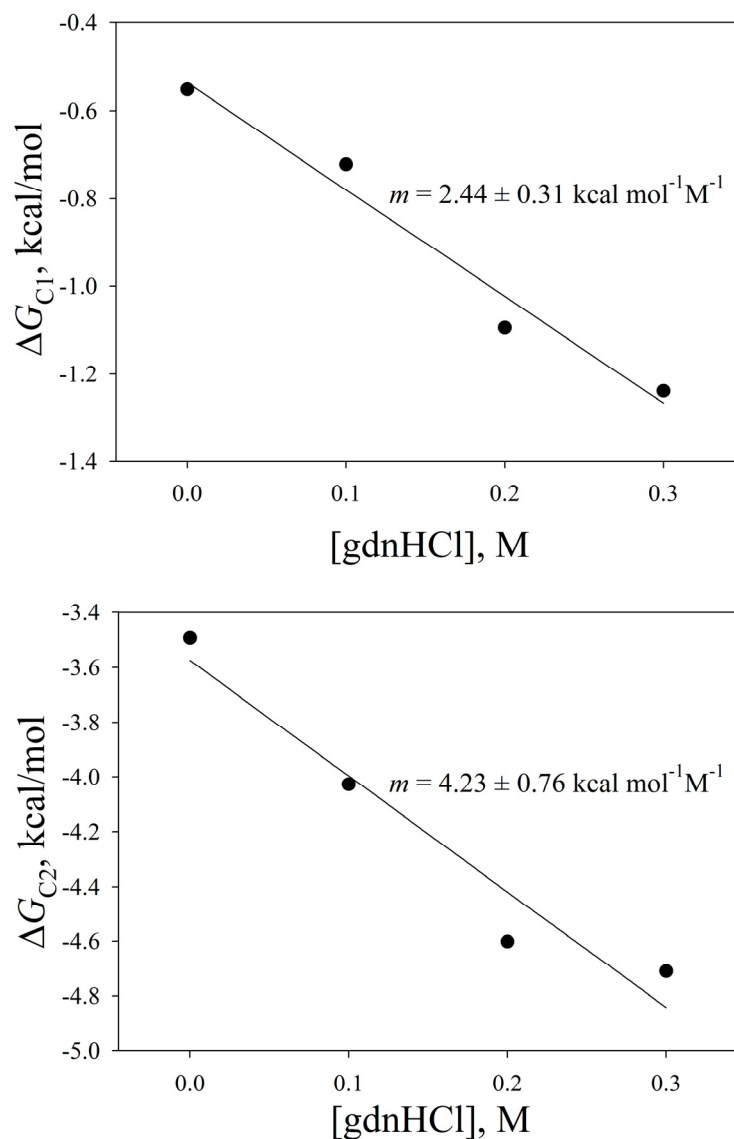

**Figure S2.** Plots of Free Energy versus gdnHCl concentration for the ACh73 variant of iso-1 Cyt *c*. The free energies,  $\Delta G_{C1}$  and  $\Delta G_{C2}$ , represent formation of the His73-heme and Lys79-heme alkaline conformers, respectively.  $\Delta G$  values were calculated as  $\Delta G = 2.303RTpK$  where  $pK_{C1}$  and  $pK_{C2}$  are used for the  $pK$  values. The data in Figure 3 of the main text were also fit using  $pK_{a,2}$  values of 9.4 and 11.1 (values obtained from pH jump data in the main text), instead of the standard constraint of 10.8. No significant changes were observed for the  $pK_{a,1}$  of His,  $pK_{C1}$  or the  $m$ -value derived from the slopes of plots of  $\Delta G$  versus gdnHCl concentration (with  $pK_{a,2} = 11.1$ ,  $m$ -values obtained are  $2.4 \pm 0.3$  and  $4.5 \pm 0.8$ ; with  $pK_{a,2}$  as 9.4,  $m$ -values obtained are  $3.2 \pm 0.9$  and  $5.3 \pm 1.3$ ) when the alternate values of  $pK_{a,2}$  were used. Thus, the choice of  $pK_{a,2}$  has minimal effect on the thermodynamic parameters obtained from these data.

**B. pH jump Stopped-flow Data for the AcH73 Variant in 0.1 M NaCl and at 25 °C**

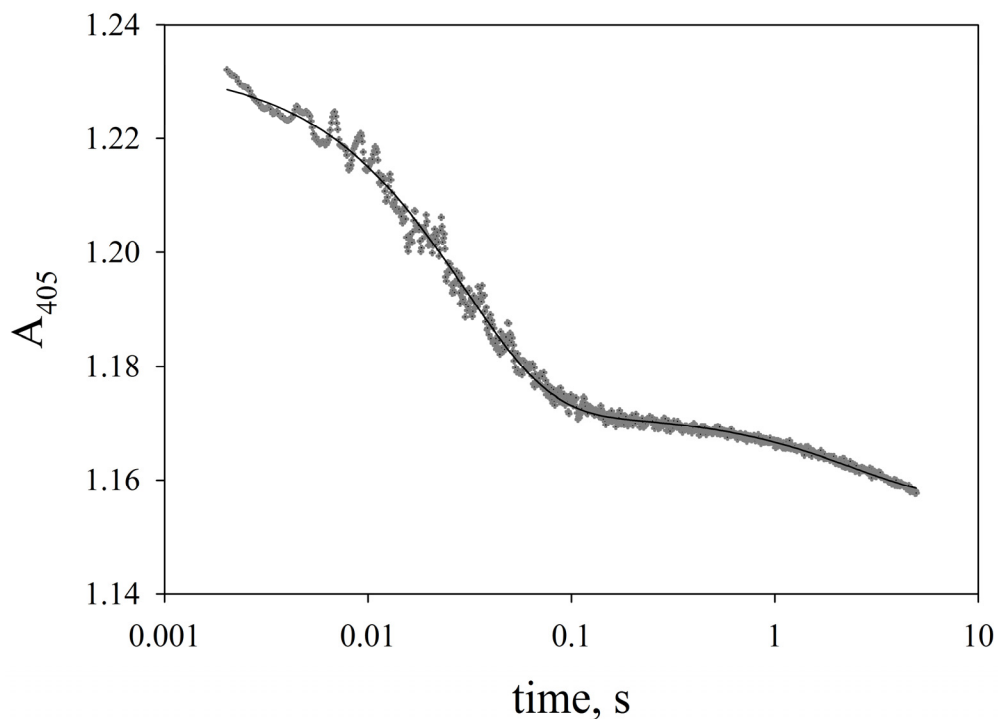

**Figure S3.** Plot of absorbance at 405 nm,  $A_{405}$ , as a function of time from 5 s downward pH jump data collected at 25° C and pH 5 for the AcH73 variant of iso-1-Cytc. The starting pH was 7.8 (0.1 M NaCl). The buffer used to produce the final pH was 10 mM acetate, pH 5 in the presence of 0.1 M NaCl. The time scale is logarithmic. The solid curve is a fit of the data to the equation for a two exponential decay.

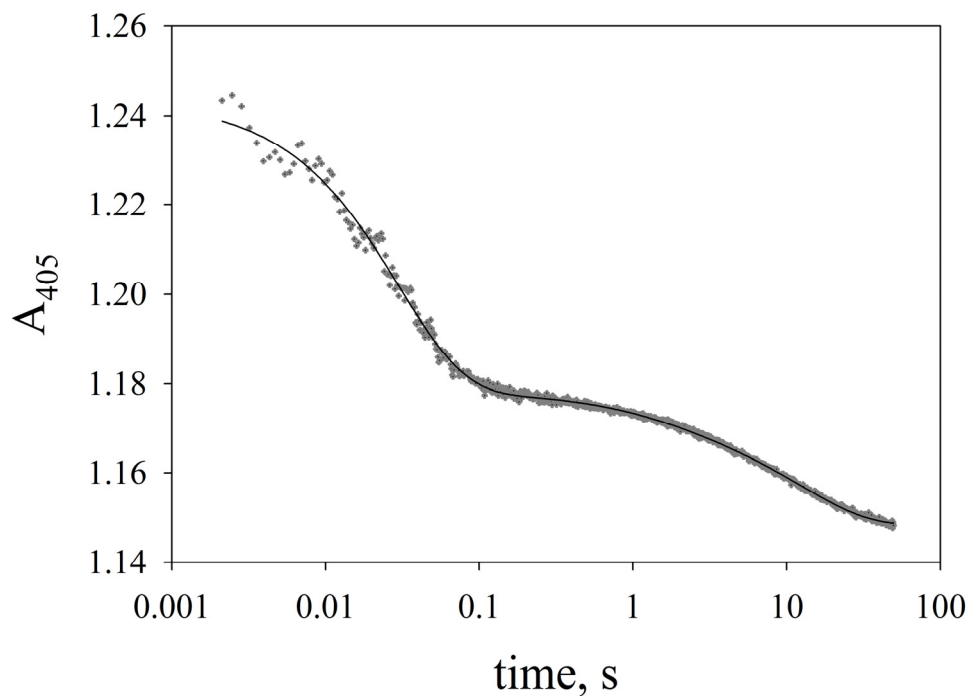

**Figure S4.** Plot of absorbance at 405 nm,  $A_{405}$ , as a function of time from 50 s downward pH jump data collected at 25° C and pH 5 for the AcH73 variant of iso-1-Cytc. The starting pH was 7.8 (0.1 M NaCl). The buffer used to produce the final pH was 10 mM acetate, pH 5 in the presence of 0.1 M NaCl. The time scale is logarithmic. The solid curve is a fit of the data to a two exponential decay equation.

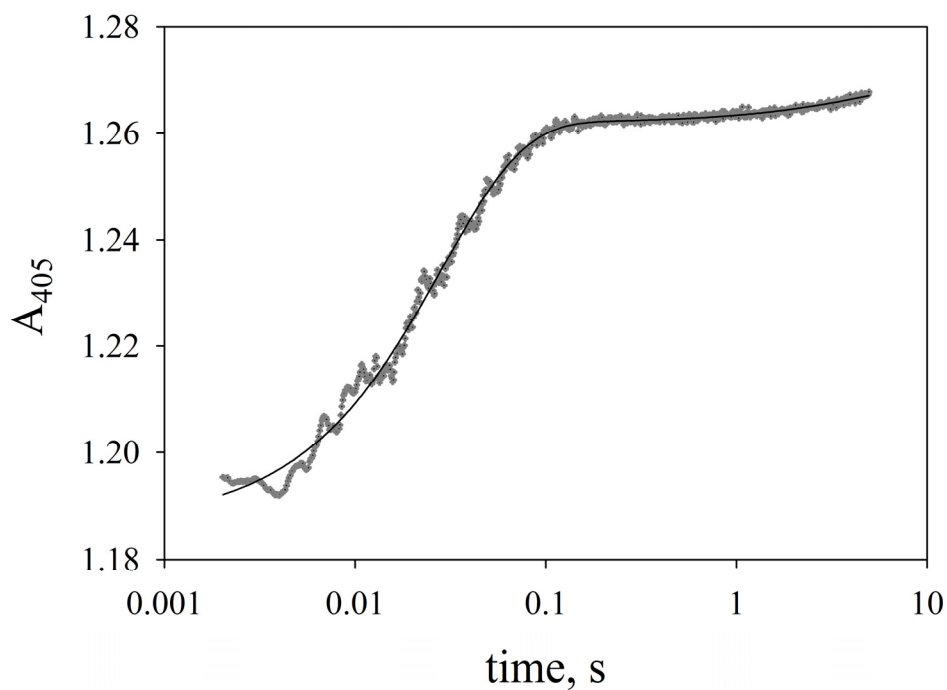

**Figure S5.** Plot of absorbance at 405 nm,  $A_{405}$ , as a function of time from 5 s upward pH jump data collected at 25° C and pH 7.2 for the AcH73 variant of iso-1-Cytc. The starting pH was 5.0 (0.1 M NaCl). The buffer used to produce the final pH was 10 mM  $\text{NaH}_2\text{PO}_4$ , pH 7.2 in the presence of 0.1 M NaCl. The time scale is logarithmic. The solid curve is a fit of the data to a two exponential rise to maximum equation.

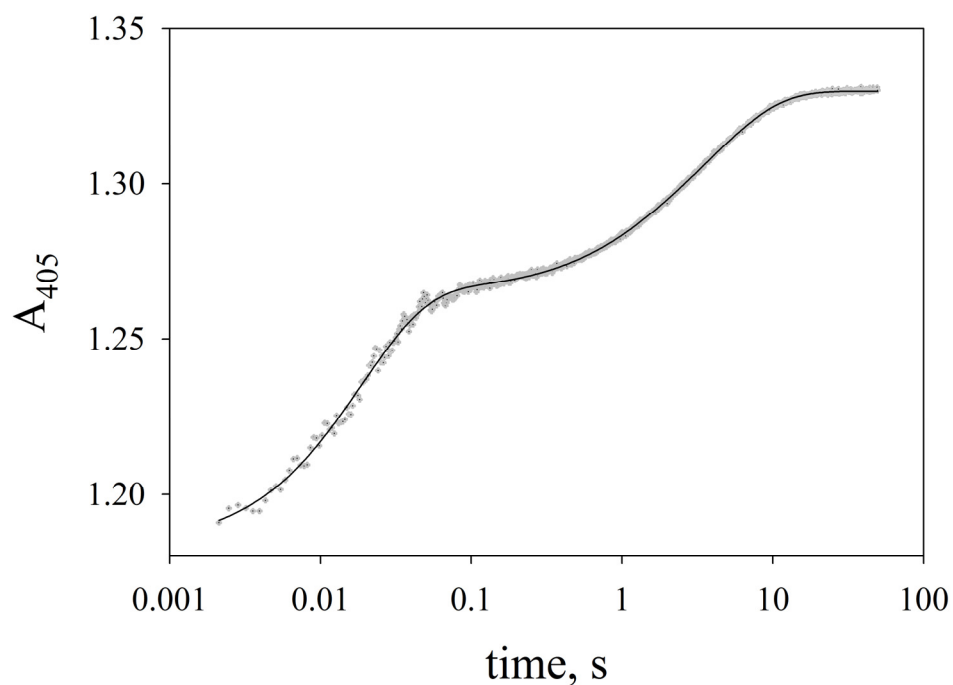

**Figure S6.** Plot of absorbance at 405 nm,  $A_{405}$ , as a function of time from 50s upward pH jump data collected at 25° C and pH 9 for the Ach73 variant of iso-1-Cytc. The starting pH was 5.0 (0.1 M NaCl). The buffer used to produce the final pH was 10 mM  $H_3BO_3$ , pH 9 in the presence of 0.1 M NaCl. The time scale is logarithmic. The solid curve is a fit of the data to a two exponential rise to maximum equation.

**Table S2.**  $k_{\text{obs}}$  data for fast kinetic phase from upward pH jumps experiments.<sup>a,b</sup>

| pH  | $k_{\text{obs}}, \text{s}^{-1}$ | pH  | $k_{\text{obs}}, \text{s}^{-1}$ | pH   | $k_{\text{obs}}, \text{s}^{-1}$ |
|-----|---------------------------------|-----|---------------------------------|------|---------------------------------|
| 5.8 | $36.9 \pm 0.8$                  | 7.8 | $32.5 \pm 1.0$                  | 9.8  | $46.3 \pm 3.6$                  |
| 6.0 | $39.4 \pm 2.2$                  | 8.0 | $33.4 \pm 0.7$                  | 10.0 | $47.7 \pm 2.8$                  |
| 6.2 | $39.0 \pm 0.8$                  | 8.2 | $37.0 \pm 1.1$                  | 10.2 | $49.7 \pm 3.2$                  |
| 6.4 | $38.2 \pm 0.7$                  | 8.4 | $36.1 \pm 1.8$                  | 10.4 | $52.4 \pm 5.2$                  |
| 6.6 | $37.8 \pm 2.1$                  | 8.6 | $36.6 \pm 1.5$                  | 10.6 | $44.4 \pm 4.8$                  |
| 6.8 | $39.4 \pm 0.9$                  | 8.8 | $39.3 \pm 1.6$                  | 10.8 | $37.8 \pm 8.9$                  |
| 7.0 | $33.6 \pm 1.6$                  | 9.0 | $41.7 \pm 2.9$                  | 11.0 | $22.1 \pm 7.2$                  |
| 7.2 | $35.8 \pm 0.8$                  | 9.2 | $42.8 \pm 3.7$                  | 11.2 | $20.0 \pm 0.2$                  |
| 7.4 | $34.4 \pm 1.1$                  | 9.4 | $44.9 \pm 3.3$                  |      |                                 |
| 7.6 | $34.6 \pm 1.1$                  | 9.6 | $47.6 \pm 4.1$                  |      |                                 |

<sup>a</sup> Data from pH 5.8 to 11.2 are the average of three data sets, two with data collected on a 5 s time scale and one with data collected on a 50 s timescale. Each data set was composed of at least 5 kinetic traces at each pH.

<sup>b</sup> Data collected on a 5 s time scale were fit to a single exponential equation and a double exponential equation at each pH. Data collected on a 50 second time were fit to a double exponential equation at each pH.



**Table S3.**  $k_{\text{obs}}$  data for slow kinetic phase from upward pH jump experiments. <sup>a,b</sup>

| pH  | $k_{\text{obs}}, \text{s}^{-1}$ | pH  | $k_{\text{obs}}, \text{s}^{-1}$ | pH   | $k_{\text{obs}}, \text{s}^{-1}$ |
|-----|---------------------------------|-----|---------------------------------|------|---------------------------------|
| 5.8 | $0.045 \pm 0.008$               | 7.8 | $0.119 \pm 0.001$               | 9.8  | $0.76 \pm 0.01$                 |
| 6.0 | $0.084 \pm 0.008$               | 8.0 | $0.124 \pm 0.002$               | 10.0 | $0.98 \pm 0.02$                 |
| 6.2 | $0.085 \pm 0.007$               | 8.2 | $0.139 \pm 0.008$               | 10.2 | $1.31 \pm 0.02$                 |
| 6.4 | $0.099 \pm 0.009$               | 8.4 | $0.157 \pm 0.001$               | 10.4 | $2.130 \pm 0.003$               |
| 6.6 | $0.106 \pm 0.004$               | 8.6 | $0.182 \pm 0.002$               | 10.6 | $3.0 \pm 0.1$                   |
| 6.8 | $0.102 \pm 0.01$                | 8.8 | $0.214 \pm 0.001$               | 10.8 | $4.5 \pm 0.4$                   |
| 7.0 | $0.101 \pm 0.003$               | 9.0 | $0.287 \pm 0.001$               | 11.0 | $5 \pm 3$                       |
| 7.2 | $0.096 \pm 0.002$               | 9.2 | $0.350 \pm 0.008$               | 11.2 | $0.205 \pm 0.048$               |
| 7.4 | $0.098 \pm 0.002$               | 9.4 | $0.450 \pm 0.006$               |      |                                 |
| 7.6 | $0.107 \pm 0.004$               | 9.6 | $0.586 \pm 0.007$               |      |                                 |

<sup>a</sup> These values are the average and standard deviation from a single 50 s data set of pH jump experiments. Each data set was composed of at least 5 kinetic traces at each pH.

<sup>b</sup> The data were fit to a double exponential equation at each pH to extract the  $k_{\text{obs}}$  for the slow phase.

**Table S4.** Amplitude data for fast kinetic phase from upward pH jumps. <sup>a,b</sup>

| pH  | Amplitude<br>(absorbance units) | pH  | Amplitude<br>(absorbance units) | pH   | Amplitude<br>(absorbance units) |
|-----|---------------------------------|-----|---------------------------------|------|---------------------------------|
| 5.8 | 0.029 ± 0.006                   | 7.8 | 0.084 ± 0.004                   | 9.8  | 0.086 ± 0.003                   |
| 6.0 | 0.041 ± 0.001                   | 8.0 | 0.083 ± 0.001                   | 10.0 | 0.084 ± 0.003                   |
| 6.2 | 0.047 ± 0.0004                  | 8.2 | 0.083 ± 0.004                   | 10.2 | 0.080 ± 0.003                   |
| 6.4 | 0.043 ± 0.003                   | 8.4 | 0.088 ± 0.004                   | 10.4 | 0.073 ± 0.005                   |
| 6.6 | 0.055 ± 0.005                   | 8.6 | 0.086 ± 0.001                   | 10.6 | 0.064 ± 0.009                   |
| 6.8 | 0.055 ± 0.003                   | 8.8 | 0.089 ± 0.002                   | 10.8 | 0.061 ± 0.014                   |
| 7.0 | 0.074 ± 0.004                   | 9.0 | 0.088 ± 0.002                   | 11.0 | 0.081 ± 0.018                   |
| 7.2 | 0.071 ± 0.005                   | 9.2 | 0.090 ± 0.004                   | 11.2 | 0.105 ± 0.001                   |
| 7.4 | 0.075 ± 0.001                   | 9.4 | 0.093 ± 0.001                   |      |                                 |
| 7.6 | 0.074 ± 0.006                   | 9.6 | 0.089 ± 0.004                   |      |                                 |

<sup>a</sup> Data from pH 5.8 to 11.2 are the average of three data sets, two with data collected on a 5 s time scale and one with data collected on a 50 s timescale. Each data set was composed of at least 5 kinetic traces at each pH.

<sup>b</sup> Data collected on a 5 s time scale were fit to a single exponential equation and a double exponential equation at each pH. Data collected on a 50 second time were fit to a double exponential equation at each pH.

**Table S5.** Amplitude data for slow kinetic phase from upward pH jump experiments.<sup>a,b</sup>

| pH  | Amplitude<br>(absorbance units) | pH  | Amplitude<br>(absorbance units) | pH   | Amplitude<br>(absorbance units) |
|-----|---------------------------------|-----|---------------------------------|------|---------------------------------|
| 5.8 | 0.0047 ± 0.0005                 | 7.8 | 0.0195 ± 0.0003                 | 9.8  | 0.0744 ± 0.0005                 |
| 6.0 | 0.0064 ± 0.0002                 | 8.0 | 0.0248 ± 0.0002                 | 10.0 | 0.0741 ± 0.0004                 |
| 6.2 | 0.0076 ± 0.0003                 | 8.2 | 0.0305 ± 0.0002                 | 10.2 | 0.0722 ± 0.0007                 |
| 6.4 | 0.0073 ± 0.0003                 | 8.4 | 0.0391 ± 0.0007                 | 10.4 | 0.0695 ± 0.001                  |
| 6.6 | 0.0075 ± 0.0007                 | 8.6 | 0.0461 ± 0.0005                 | 10.6 | 0.0664 ± 0.001                  |
| 6.8 | 0.0086 ± 0.0008                 | 8.8 | 0.0526 ± 0.0002                 | 10.8 | 0.0602 ± 0.007                  |
| 7.0 | 0.0114 ± 0.0003                 | 9.0 | 0.0620 ± 0.0002                 | 11.0 | 0.0340 ± 0.025                  |
| 7.2 | 0.0130 ± 0.0003                 | 9.2 | 0.067 ± 0.001                   | 11.2 | 0.0038 ± 0.0006                 |
| 7.4 | 0.0147 ± 0.0003                 | 9.4 | 0.0707 ± 0.0005                 |      |                                 |
| 7.6 | 0.0171 ± 0.0001                 | 9.6 | 0.0729 ± 0.0007                 |      |                                 |

<sup>a</sup> These values are the average and standard deviation from a single data 50 s set of pH jump experiments. Each data set was composed of at least 5 kinetic traces at each pH.

<sup>b</sup> The data were fit to a double exponential equation at each pH to extract the  $k_{\text{obs}}$  for the slow phase.

**Table S6.**  $k_{\text{obs}}$  and amplitude data for fast kinetic phase from downward pH jump experiments.<sup>a,b</sup>

| pH  | $k_{\text{obs}}, \text{s}^{-1}$ | Amplitude<br>(absorbance units) |
|-----|---------------------------------|---------------------------------|
| 5.0 | $33.0 \pm 1.5$                  | $0.067 \pm 0.009$               |
| 5.2 | $35.1 \pm 1.1$                  | $0.060 \pm 0.001$               |
| 5.4 | $35.6 \pm 0.3$                  | $0.056 \pm 0.001$               |
| 5.6 | $35.3 \pm 1.6$                  | $0.051 \pm 0.001$               |
| 5.8 | $35.4 \pm 4.3$                  | $0.040 \pm 0.002$               |
| 6.0 | $33.9 \pm 1.3$                  | $0.035 \pm 0.005$               |
| 6.2 | $36.0 \pm 1.6$                  | $0.027 \pm 0.001$               |
| 6.4 | $35.0 \pm 1.0$                  | $0.019 \pm 0.001$               |

<sup>a</sup> Data are the average of three data sets, two with data collected on a 5 s time scale and one with data collected on a 50 s timescale. Each data set was composed of at least 5 kinetic traces at each pH.

<sup>b</sup> Data collected on a 5 s time scale were fit to a single exponential equation and a double exponential equation at each pH. Data collected on a 50 second time were fit to a double exponential equation at each pH.

**Table S7.**  $k_{\text{obs}}$  and amplitude data for slow kinetic phase from downward pH jump experiments.<sup>a,b</sup>

| pH  | $k_{\text{obs}}, \text{s}^{-1}$ | Amplitude<br>(absorbance units) |
|-----|---------------------------------|---------------------------------|
| 5.0 | $0.113 \pm 0.002$               | $0.0270 \pm 0.0004$             |
| 5.2 | $0.115 \pm 0.001$               | $0.0260 \pm 0.0003$             |
| 5.4 | $0.112 \pm 0.001$               | $0.0240 \pm 0.0006$             |
| 5.6 | $0.115 \pm 0.002$               | $0.0210 \pm 0.0003$             |
| 5.8 | $0.116 \pm 0.003$               | $0.0180 \pm 0.0005$             |
| 6.0 | $0.107 \pm 0.013$               | $0.0130 \pm 0.0007$             |
| 6.2 | $0.106 \pm 0.015$               | $0.0110 \pm 0.0003$             |
| 6.4 | $0.103 \pm 0.021$               | $0.0007 \pm 0.0007$             |

<sup>a</sup> These values are the average and standard deviation from a single 50 s data set of pH jump experiments. Each data set was composed of at least 5 kinetic traces at each pH.

<sup>b</sup> The data were fit to a double exponential equation at each pH to extract the  $k_{\text{obs}}$  for the slow phase.

### C. Gated Electron Transfer Kinetic Data.

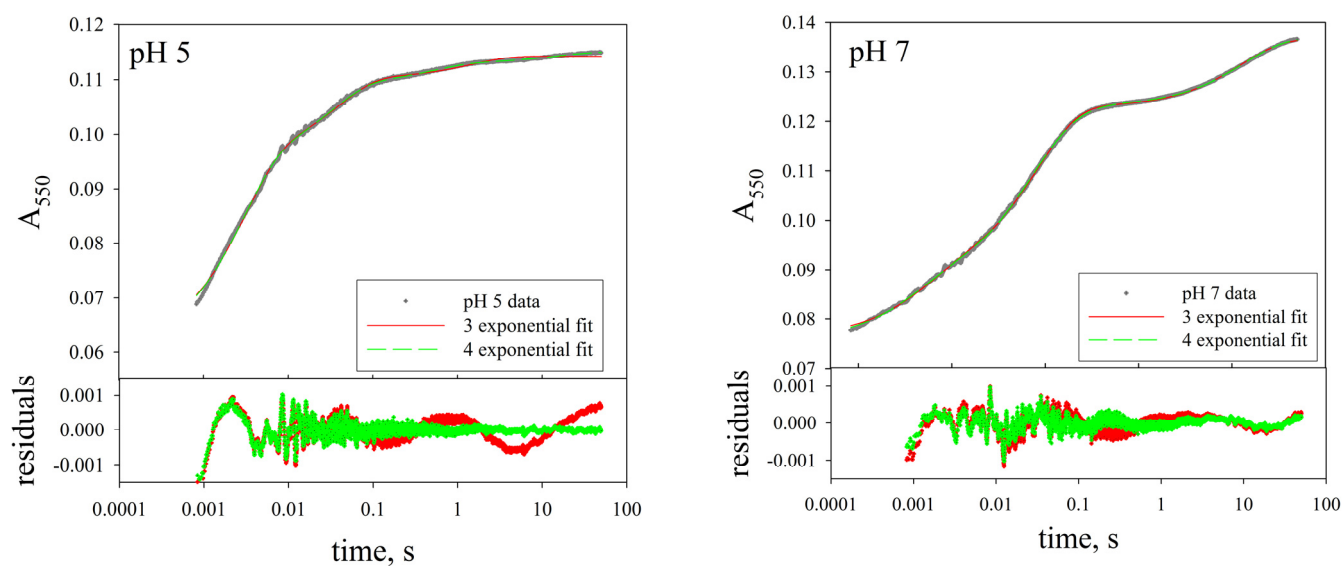

**Figure S7.** Plots of absorbance at 550 nm as a function of time (top panels) and residuals (bottom panels) for 3 and 4 exponential rise to maximum fits to the data as a function of time for  $\sim 5$  mM  $a_6Ru^{2+}$  at pH 5 (left, 10 mM acetic acid buffer) and pH 7 (right, 10 mM  $NaH_2PO_4$  buffer) in 0.1 M NaCl.

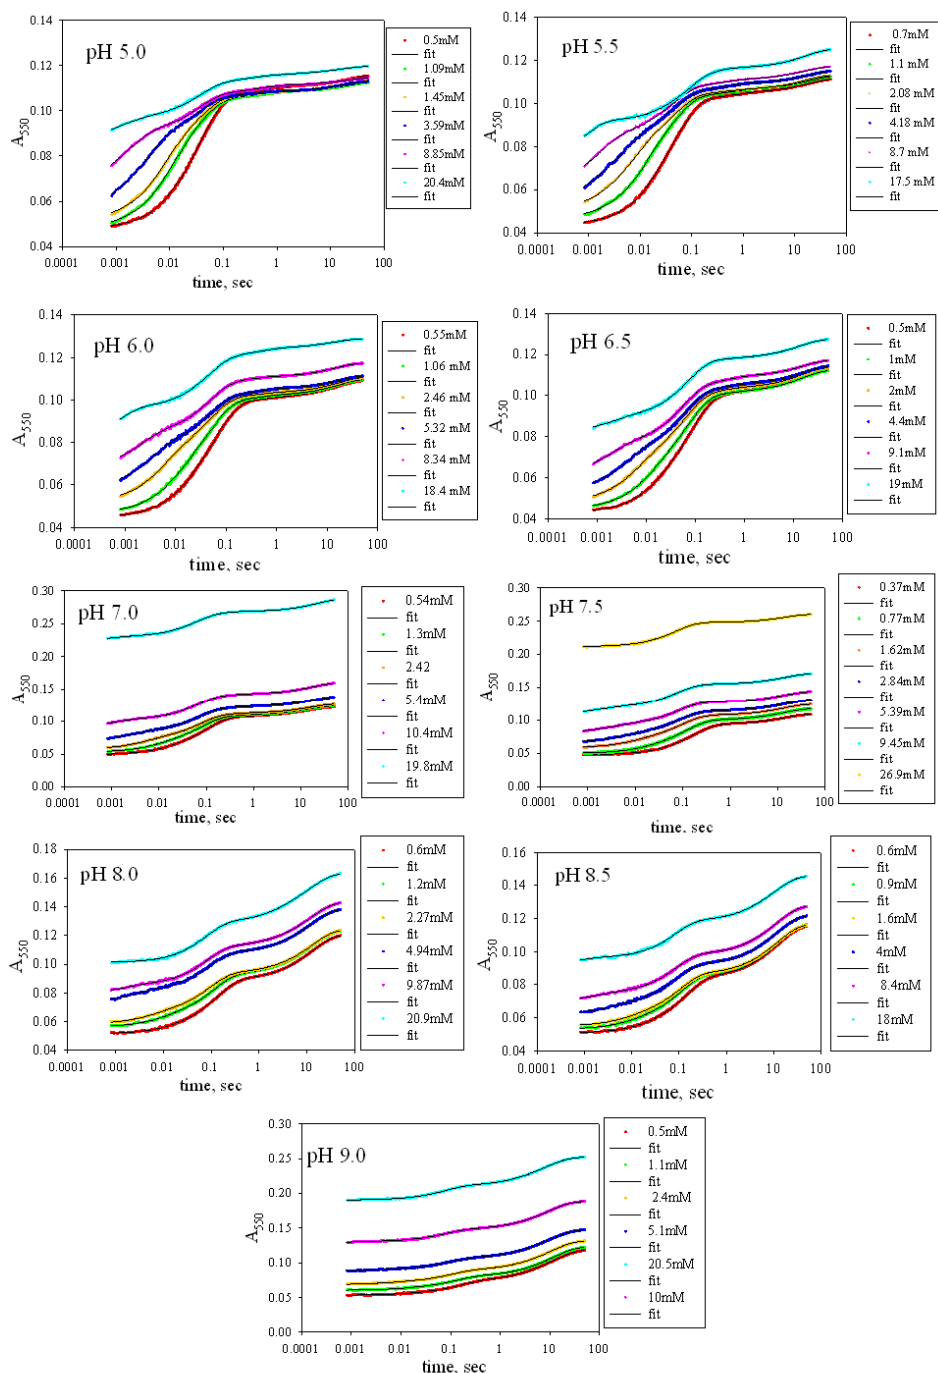

**Figure S8.** Plots of absorbance at 550 nm as a function of time at different concentrations of  $a_6Ru^{2+}$  at pH 5.0, 5.5, 6.0, 6.5, 7.0, 7.5, 8.0, 8.5 and 9.0. Buffers are all 10 mM containing 0.1 M NaCl. All data were collected at 25 °C. The solid lines are fits to a four exponential rise to maximum equation. Rate constant and amplitude parameters from these fits are collected in Tables S8 to S11.

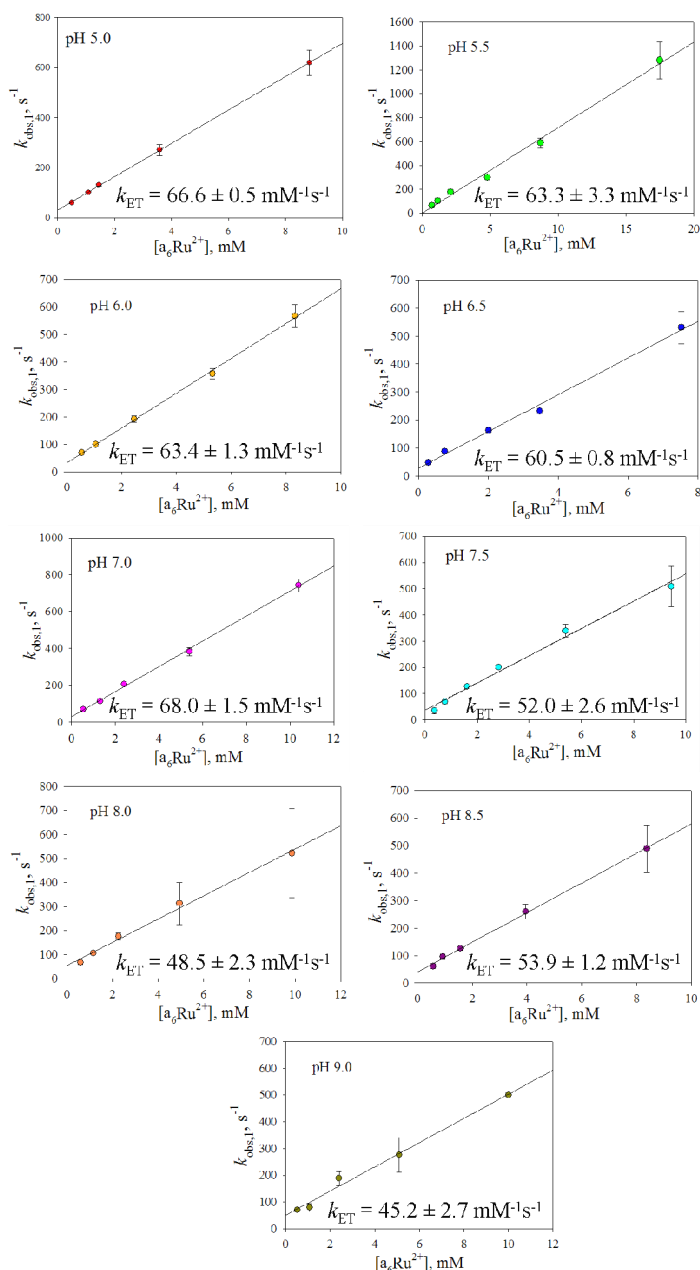

**Figure S9.** Plots of observed rate constant,  $k_{\text{obs},1}$ , for the reaction of  $\text{a}_6\text{Ru}^{2+}$  with the native conformer of the AcH73 variant (fastest phase) at 25 °C as a function of  $\text{a}_6\text{Ru}^{2+}$  concentration for pH 5, 5.5, 6, 6.5, 7, 7.5, 8, 8.5 and 9. Buffers, as described in main text, are 10 mM and contain 0.1 M NaCl. The solid lines are fits to a linear equation. The rate constants shown in this figure are collected in Table S8. Values for the highest concentration, i.e., ~20 mM for fast phase, are mostly not included in these plots due to the relatively large errors in  $k_{\text{obs}}$  at this concentration of  $\text{a}_6\text{Ru}^{2+}$  (see Table S8) and thus were not used in evaluating  $k_{\text{ET}}$ . At 20 mM  $\text{a}_6\text{Ru}^{2+}$  most of the fast phase amplitude occurs in the mixing dead time, as can be seen in Figure S8.



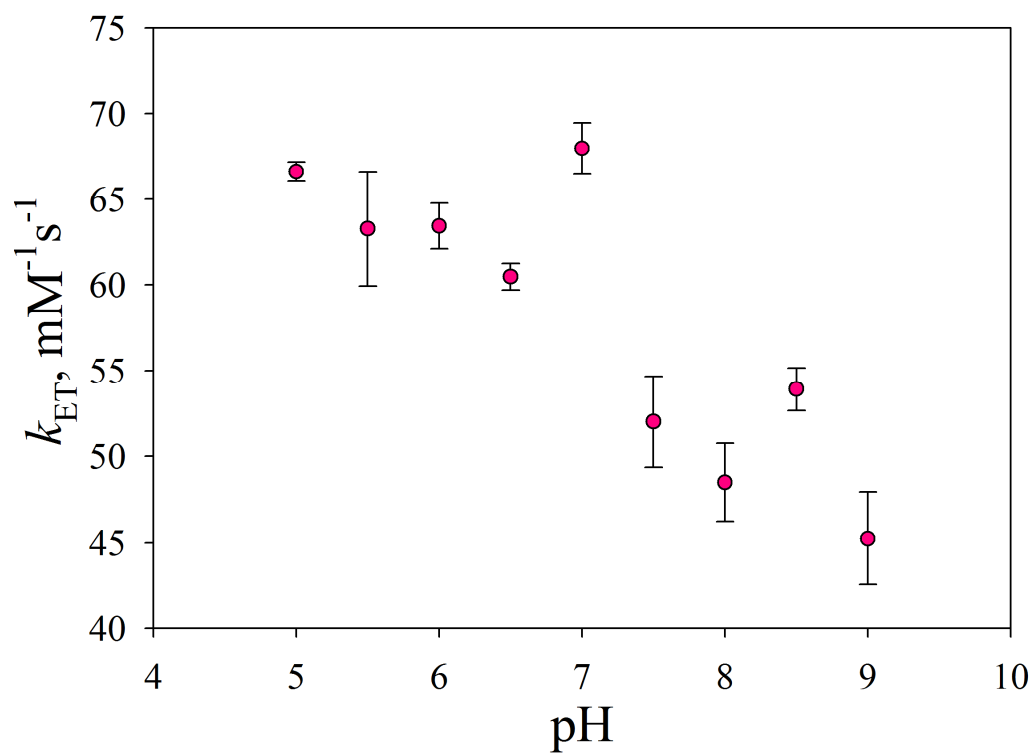

**Figure S10.** Plot of  $k_{\text{ET}}$  ( $\text{mM}^{-1}\text{s}^{-1}$ ) as a function of pH at 25 °C. The values for  $k_{\text{ET}}$  are obtained from fits to eq 5 in the main text as shown in Figure S9.

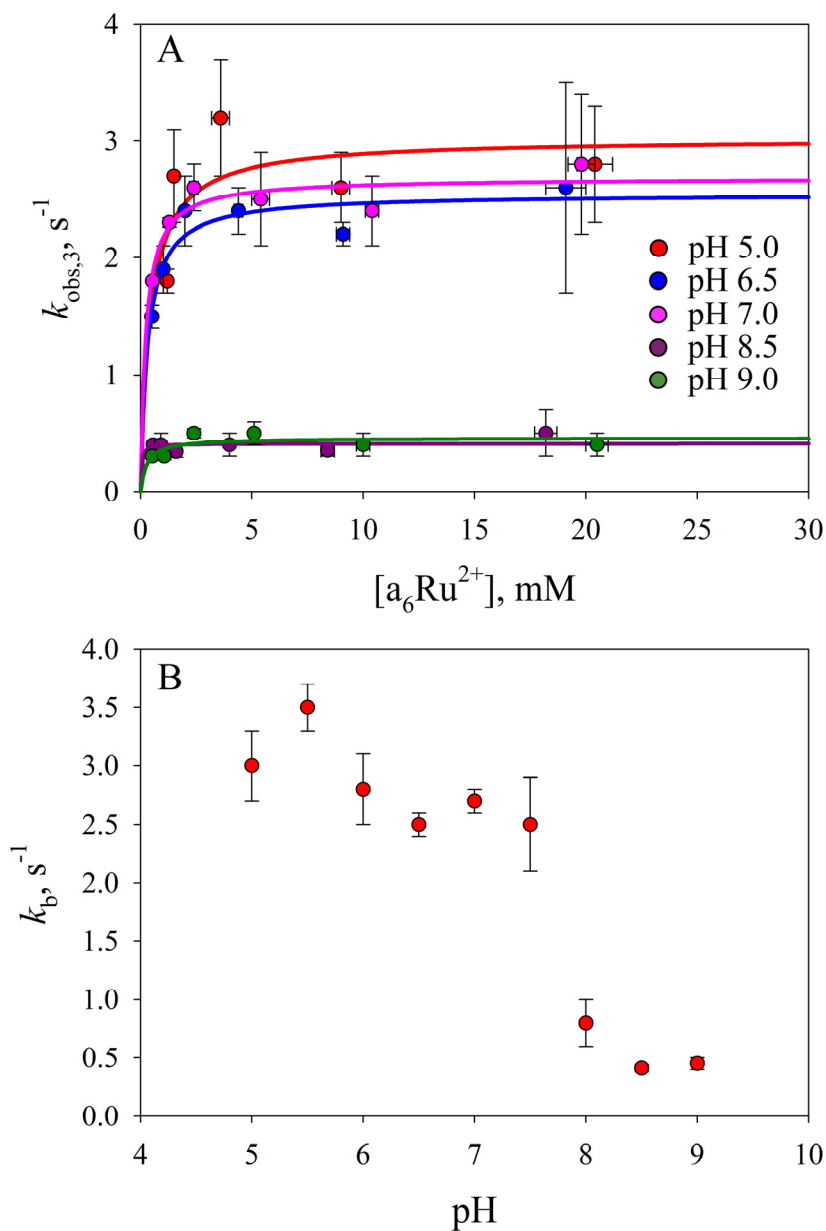

**Figure S11.** (A) Plots of  $k_{\text{obs},3}$  versus the concentration of  $\text{a}_6\text{Ru}^{2+}$  for the reaction of  $\text{a}_6\text{Ru}^{2+}$  with the AcH73 variant at selected pH values between pH 5 and 9 in 10 mM buffers containing 0.1 M NaCl at 25 °C. The solid lines are fits to eq 6 (main text) which gives values for  $k_b$  and  $k_f$  as defined in Figure 6 (main text).  $k_b$  and  $k_f$  from these fits are collected in Table S13. (B) Plot of  $k_b$  versus pH.  $k_b$  is derived from fits of eq 6 in the main text to  $k_{\text{obs},3}$  versus  $\text{a}_6\text{Ru}^{2+}$  concentration data.  $k_b$  values are from Table S13.

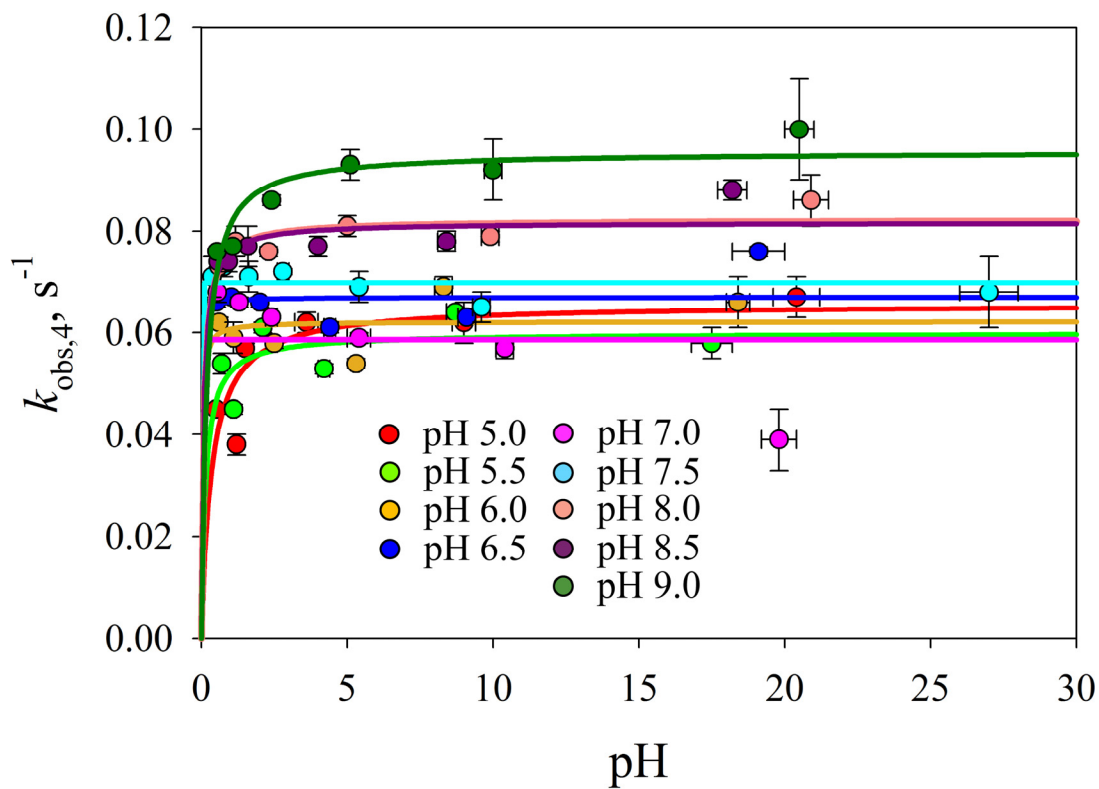

**Figure S12.** Plots of  $k_{\text{obs},4}$  versus the concentration of  $\text{a}_6\text{Ru}^{2+}$  for the reaction of  $\text{a}_6\text{Ru}^{2+}$  with the AcH73 variant from pH 5 to 9 in 10 mM buffers containing 0.1 M NaCl at 25 °C. The solid lines are fits to eq 6 (main text) which gives values for  $k_b$  and  $k_f$  as defined in Figure 6 (main text).  $k_b$  and  $k_f$  from these fits are collected in Table S14.

**Table S8.** Fast rate constant,  $k_{\text{obs},1}$ , and its amplitude for the reduction of AcH73 iso-1-cytochrome *c* by  $\text{a}_6\text{Ru}^{2+}$  as a function of pH and  $[\text{a}_6\text{Ru}^{2+}]$  from four exponential fits to the data in Figure S8.

| pH         | $[\text{a}_6\text{Ru}^{2+}]$ , mM | $k_{\text{obs}}$ , $\text{s}^{-1}$ | Amplitude           |
|------------|-----------------------------------|------------------------------------|---------------------|
| <b>5.0</b> | $0.5 \pm 0.1$                     | $60 \pm 3$                         | $0.015 \pm 0.002$   |
|            | $1.1 \pm 0.1$                     | $102 \pm 2$                        | $0.030 \pm 0.001$   |
|            | $1.5 \pm 0.1$                     | $132 \pm 5$                        | $0.0312 \pm 0.0010$ |
|            | $3.6 \pm 0.4$                     | $271 \pm 22$                       | $0.0286 \pm 0.0004$ |
|            | $9.0 \pm 0.4$                     | $619 \pm 50$                       | $0.0225 \pm 0.0010$ |
|            | $20.4 \pm 0.8$                    | $1215 \pm 346$                     | $0.0148 \pm 0.0050$ |
| <b>5.5</b> | $0.7 \pm 0.1$                     | $63.4 \pm 4$                       | $0.0130 \pm 0.0008$ |
|            | $1.1 \pm 0.1$                     | $102 \pm 2$                        | $0.0233 \pm 0.0007$ |
|            | $2.1 \pm 0.1$                     | $175 \pm 3$                        | $0.0262 \pm 0.0002$ |
|            | $4.2 \pm 0.2$                     | $298 \pm 11$                       | $0.0251 \pm 0.0006$ |
|            | $8.7 \pm 0.3$                     | $587 \pm 42$                       | $0.0221 \pm 0.0010$ |
|            | $17.5 \pm 0.7$                    | $1280 \pm 152$                     | $0.0182 \pm 0.0030$ |
| <b>6.0</b> | $0.6 \pm 0.1$                     | $69 \pm 4$                         | $0.0107 \pm 0.0007$ |
|            | $1.1 \pm 0.1$                     | $99 \pm 7$                         | $0.0174 \pm 0.0009$ |
|            | $2.5 \pm 0.1$                     | $192 \pm 12$                       | $0.0235 \pm 0.0040$ |
|            | $5.3 \pm 0.1$                     | $357 \pm 20$                       | $0.0195 \pm 0.0003$ |
|            | $8.3 \pm 0.3$                     | $568 \pm 41$                       | $0.0177 \pm 0.0010$ |
|            | $18.4 \pm 0.4$                    | $1284 \pm 390$                     | $0.0154 \pm 0.0080$ |
| <b>6.5</b> | $0.52 \pm 0.02$                   | $69 \pm 2$                         | $0.0114 \pm 0.0003$ |
|            | $1.02 \pm 0.03$                   | $99 \pm 2$                         | $0.0162 \pm 0.0002$ |
|            | $2.0 \pm 0.1$                     | $168 \pm 6$                        | $0.0188 \pm 0.0003$ |
|            | $4.4 \pm 0.2$                     | $299 \pm 12$                       | $0.0181 \pm 0.0005$ |
|            | $9.1 \pm 0.3$                     | $592 \pm 52$                       | $0.0155 \pm 0.0010$ |
|            | $19.1 \pm 0.9$                    | $1037 \pm 273$                     | $0.0107 \pm 0.0030$ |
| <b>7.0</b> | $0.54 \pm 0.02$                   | $69 \pm 6$                         | $0.0087 \pm 0.0002$ |
|            | $1.30 \pm 0.04$                   | $113 \pm 3$                        | $0.0127 \pm 0.0002$ |
|            | $2.4 \pm 0.2$                     | $206 \pm 9$                        | $0.0145 \pm 0.0004$ |
|            | $5.4 \pm 0.4$                     | $382 \pm 24$                       | $0.0132 \pm 0.0004$ |
|            | $10.4 \pm 0.3$                    | $742 \pm 35$                       | $0.0123 \pm 0.0010$ |
|            | $19.8 \pm 0.6$                    | $1497 \pm 428$                     | $0.0101 \pm 0.0050$ |
| <b>7.5</b> | $0.37 \pm 0.04$                   | $34 \pm 11$                        | $0.0038 \pm 0.0008$ |
|            | $0.77 \pm 0.06$                   | $68 \pm 8$                         | $0.0069 \pm 0.0008$ |
|            | $1.62 \pm 0.04$                   | $125 \pm 8$                        | $0.0161 \pm 0.0100$ |
|            | $2.8 \pm 0.2$                     | $201 \pm 3$                        | $0.0116 \pm 0.0002$ |
|            | $5.4 \pm 0.1$                     | $339 \pm 25$                       | $0.0119 \pm 0.0003$ |
|            | $9.4 \pm 0.3$                     | $509 \pm 77$                       | $0.0100 \pm 0.0007$ |
|            | $27 \pm 1$                        | $1765 \pm 137$                     | $0.0058 \pm 0.0010$ |

|            |                 |                  |                       |
|------------|-----------------|------------------|-----------------------|
| <b>8.0</b> | $0.61 \pm 0.04$ | $67 \pm 9$       | $0.0040 \pm 0.0002$   |
|            | $1.17 \pm 0.03$ | $106 \pm 5$      | $0.006 \pm 0.001$     |
|            | $2.3 \pm 0.1$   | $175 \pm 14$     | $0.007 \pm 0.001$     |
|            | $4.9 \pm 0.1$   | $312 \pm 88$     | $0.007 \pm 0.001$     |
|            | $9.9 \pm 0.3$   | $521 \pm 184$    | $0.006 \pm 0.001$     |
|            | $20.9 \pm 0.6$  | $1175 \pm 480$   | $0.002 \pm 0.002$     |
| <b>8.5</b> | $0.57 \pm 0.03$ | $61 \pm 5$       | $0.0037 \pm 0.0002$   |
|            | $0.92 \pm 0.11$ | $96 \pm 10$      | $0.0052 \pm 0.0002$   |
|            | $1.6 \pm 0.1$   | $126 \pm 8$      | $0.0057 \pm 0.0004$   |
|            | $4.0 \pm 0.1$   | $259 \pm 27$     | $0.0058 \pm 0.0002$   |
|            | $8.4 \pm 0.3$   | $489 \pm 86$     | $0.005 \pm 0.001$     |
|            | $18.2 \pm 0.5$  | $1555 \pm 127^a$ | $0.007 \pm 0.010^a$   |
| <b>9.0</b> | $0.53 \pm 0.03$ | $71 \pm 13$      | $0.0020 \pm 0.0002$   |
|            | $1.07 \pm 0.03$ | $80 \pm 13$      | $0.0029 \pm 0.0001$   |
|            | $2.4 \pm 0.1$   | $189 \pm 26$     | $0.0033 \pm 0.0001$   |
|            | $5.1 \pm 0.1$   | $277 \pm 64$     | $0.0031 \pm 0.0003$   |
|            | $10.0 \pm 0.3$  | $500 \pm 6$      | $0.003 \pm 0.002$     |
|            | $20.5 \pm 0.5$  | $1511 \pm 555^a$ | $0.0012 \pm 0.0007^a$ |

---

<sup>a</sup> This rate constant value is taken from one trial as values from the other trials showed variation due to the low observable amplitude at the highest concentration of  $a_6\text{Ru}^{2+}$ .

---

**Table S9.** First intermediate rate constant,  $k_{\text{obs},2}$ , and its amplitude for the reduction of AcH73 iso-1-cytochrome *c* by  $\text{a}_6\text{Ru}^{2+}$  as a function of pH and  $[\text{a}_6\text{Ru}^{2+}]$  at 25 °C from four exponential fits to the data in Figure S8.

| pH         | $[\text{a}_6\text{Ru}^{2+}]$ , mM | $k_{\text{obs}}$ , $\text{s}^{-1}$ | Amplitude           |
|------------|-----------------------------------|------------------------------------|---------------------|
| <b>5.0</b> | $0.5 \pm 0.1$                     | $21.0 \pm 0.3$                     | $0.0456 \pm 0.0020$ |
|            | $1.2 \pm 0.1$                     | $26 \pm 1$                         | $0.0265 \pm 0.0010$ |
|            | $1.5 \pm 0.1$                     | $26 \pm 1$                         | $0.0234 \pm 0.0010$ |
|            | $3.6 \pm 0.4$                     | $28 \pm 2$                         | $0.0193 \pm 0.0010$ |
|            | $9.0 \pm 0.4$                     | $31 \pm 1$                         | $0.0173 \pm 0.0004$ |
|            | $20.4 \pm 0.8$                    | $27 \pm 1$                         | $0.0166 \pm 0.0004$ |
| <b>5.5</b> | $0.7 \pm 0.1$                     | $18 \pm 0.2$                       | $0.0454 \pm 0.0009$ |
|            | $1.1 \pm 0.1$                     | $23.0 \pm 0.5$                     | $0.0333 \pm 0.0008$ |
|            | $2.1 \pm 0.1$                     | $23.0 \pm 0.5$                     | $0.0268 \pm 0.0003$ |
|            | $4.2 \pm 0.2$                     | $25.4 \pm 0.2$                     | $0.0237 \pm 0.0006$ |
|            | $8.7 \pm 0.3$                     | $24 \pm 1$                         | $0.0227 \pm 0.0004$ |
|            | $17.5 \pm 0.7$                    | $12 \pm 1$                         | $0.0199 \pm 0.0014$ |
| <b>6.0</b> | $0.6 \pm 0.1$                     | $15 \pm 0.4$                       | $0.0431 \pm 0.0006$ |
|            | $1.1 \pm 0.1$                     | $19 \pm 1$                         | $0.0348 \pm 0.0010$ |
|            | $2.5 \pm 0.1$                     | $21 \pm 1$                         | $0.0277 \pm 0.0007$ |
|            | $5.3 \pm 0.1$                     | $22.0 \pm 0.4$                     | $0.0245 \pm 0.0005$ |
|            | $8.3 \pm 0.3$                     | $21 \pm 1$                         | $0.0243 \pm 0.0006$ |
|            | $18.4 \pm 0.4$                    | $22.0 \pm 0.3$                     | $0.0234 \pm 0.0005$ |
| <b>6.5</b> | $0.52 \pm 0.02$                   | $12.0 \pm 0.1$                     | $0.0444 \pm 0.0010$ |
|            | $1.02 \pm 0.03$                   | $14.0 \pm 0.2$                     | $0.0386 \pm 0.0005$ |
|            | $2.0 \pm 0.1$                     | $16.0 \pm 0.4$                     | $0.0333 \pm 0.0002$ |
|            | $4.4 \pm 0.2$                     | $17.4 \pm 0.1$                     | $0.0302 \pm 0.0006$ |
|            | $9.1 \pm 0.3$                     | $18.2 \pm 0.2$                     | $0.0288 \pm 0.0004$ |
|            | $19.1 \pm 0.9$                    | $15.0 \pm 0.4$                     | $0.0286 \pm 0.0005$ |
| <b>7.0</b> | $0.54 \pm 0.02$                   | $9.5 \pm 0.1$                      | $0.0467 \pm 0.0009$ |
|            | $1.30 \pm 0.04$                   | $12.1 \pm 0.1$                     | $0.0412 \pm 0.0003$ |
|            | $2.4 \pm 0.2$                     | $14.0 \pm 0.3$                     | $0.0368 \pm 0.0004$ |
|            | $5.4 \pm 0.4$                     | $14.5 \pm 0.3$                     | $0.0354 \pm 0.0007$ |
|            | $10.4 \pm 0.3$                    | $15 \pm 1$                         | $0.0356 \pm 0.0010$ |
|            | $19.8 \pm 0.6$                    | $15.0 \pm 1.3$                     | $0.0378 \pm 0.0020$ |
| <b>7.5</b> | $0.37 \pm 0.04$                   | $5.6 \pm 0.4$                      | $0.0420 \pm 0.0050$ |
|            | $0.77 \pm 0.06$                   | $8.6 \pm 0.5$                      | $0.0410 \pm 0.0010$ |
|            | $1.62 \pm 0.04$                   | $11.0 \pm 0.4$                     | $0.0375 \pm 0.0003$ |
|            | $2.8 \pm 0.2$                     | $12.0 \pm 0.1$                     | $0.0352 \pm 0.0003$ |
|            | $5.4 \pm 0.1$                     | $13.0 \pm 0.6$                     | $0.0341 \pm 0.0010$ |
|            | $9.4 \pm 0.3$                     | $13.1 \pm 0.6$                     | $0.0337 \pm 0.0010$ |
|            | $27 \pm 1$                        | $14.1 \pm 0.7$                     | $0.0343 \pm 0.0020$ |

|            |                 |                |                     |
|------------|-----------------|----------------|---------------------|
| <b>8.0</b> | $0.61 \pm 0.04$ | $7.4 \pm 0.1$  | $0.0324 \pm 0.0006$ |
|            | $1.17 \pm 0.03$ | $9.0 \pm 0.3$  | $0.0298 \pm 0.0004$ |
|            | $2.3 \pm 0.1$   | $11.0 \pm 0.6$ | $0.0276 \pm 0.0002$ |
|            | $4.9 \pm 0.1$   | $11.7 \pm 0.5$ | $0.0269 \pm 0.0003$ |
|            | $9.9 \pm 0.3$   | $12.4 \pm 0.6$ | $0.0268 \pm 0.0005$ |
|            | $20.9 \pm 0.6$  | $13.0 \pm 0.5$ | $0.0269 \pm 0.0010$ |
| <b>8.5</b> | $0.57 \pm 0.03$ | $7.0 \pm 0.1$  | $0.0294 \pm 0.0003$ |
|            | $0.92 \pm 0.11$ | $9.9 \pm 0.2$  | $0.0269 \pm 0.0005$ |
|            | $1.6 \pm 0.1$   | $10.0 \pm 0.2$ | $0.0255 \pm 0.0002$ |
|            | $4.0 \pm 0.1$   | $11.0 \pm 0.3$ | $0.0241 \pm 0.0003$ |
|            | $8.4 \pm 0.3$   | $12.0 \pm 0.2$ | $0.0233 \pm 0.0003$ |
|            | $18.2 \pm 0.5$  | $12.0 \pm 0.5$ | $0.0215 \pm 0.0005$ |
| <b>9.0</b> | $0.53 \pm 0.03$ | $5.9 \pm 0.1$  | $0.0189 \pm 0.0003$ |
|            | $1.07 \pm 0.03$ | $7.5 \pm 0.1$  | $0.0172 \pm 0.0001$ |
|            | $2.4 \pm 0.1$   | $9.5 \pm 0.2$  | $0.0175 \pm 0.0004$ |
|            | $5.1 \pm 0.1$   | $10.6 \pm 0.4$ | $0.0163 \pm 0.0003$ |
|            | $10.0 \pm 0.3$  | $11.2 \pm 1.2$ | $0.0165 \pm 0.0020$ |
|            | $20.5 \pm 0.5$  | $11.8 \pm 0.3$ | $0.0192 \pm 0.0007$ |

---

**Table S10.** Second intermediate rate constant,  $k_{\text{obs},3}$ , and its amplitude for the reduction of AcH73 iso-1-cytochrome *c* by  $\text{a}_6\text{Ru}^{2+}$  as a function of pH and  $[\text{a}_6\text{Ru}^{2+}]$  at 25 °C from four exponential fits to the data in Figure S8.

| pH         | $[\text{a}_6\text{Ru}^{2+}]$ , mM | $k_{\text{obs}}$ , $\text{s}^{-1}$ | Amplitude           |
|------------|-----------------------------------|------------------------------------|---------------------|
| <b>5.0</b> | $0.5 \pm 0.1$                     | $1.5 \pm 0.1$                      | $0.0027 \pm 0.0001$ |
|            | $1.2 \pm 0.1$                     | $1.8 \pm 0.1$                      | $0.0032 \pm 0.0001$ |
|            | $1.5 \pm 0.1$                     | $2.7 \pm 0.4$                      | $0.0020 \pm 0.0002$ |
|            | $3.6 \pm 0.4$                     | $3.2 \pm 0.5$                      | $0.0022 \pm 0.0003$ |
|            | $9.0 \pm 0.4$                     | $2.6 \pm 0.3$                      | $0.0040 \pm 0.0003$ |
|            | $20.4 \pm 0.8$                    | $2.8 \pm 0.5$                      | $0.0029 \pm 0.0006$ |
| <b>5.5</b> | $0.7 \pm 0.1$                     | $1.4 \pm 0.1$                      | $0.0030 \pm 0.0002$ |
|            | $1.1 \pm 0.1$                     | $1.6 \pm 0.1$                      | $0.0038 \pm 0.0002$ |
|            | $2.1 \pm 0.1$                     | $2.5 \pm 0.2$                      | $0.0028 \pm 0.0002$ |
|            | $4.2 \pm 0.2$                     | $2.4 \pm 0.05$                     | $0.0043 \pm 0.0003$ |
|            | $8.7 \pm 0.3$                     | $3.0 \pm 0.3$                      | $0.0037 \pm 0.0001$ |
|            | $17.5 \pm 0.7$                    | $3.5 \pm 0.8$                      | $0.0042 \pm 0.0020$ |
| <b>6.0</b> | $0.6 \pm 0.1$                     | $2.0 \pm 0.2$                      | $0.0026 \pm 0.0003$ |
|            | $1.1 \pm 0.1$                     | $2.1 \pm 0.2$                      | $0.0029 \pm 0.0003$ |
|            | $2.5 \pm 0.1$                     | $2.8 \pm 0.2$                      | $0.0029 \pm 0.0003$ |
|            | $5.3 \pm 0.1$                     | $2.6 \pm 0.1$                      | $0.0039 \pm 0.0001$ |
|            | $8.3 \pm 0.3$                     | $3.4 \pm 0.2$                      | $0.0027 \pm 0.0004$ |
|            | $18.4 \pm 0.4$                    | $2.2 \pm 0.1$                      | $0.0044 \pm 0.0002$ |
| <b>6.5</b> | $0.52 \pm 0.02$                   | $1.5 \pm 0.1$                      | $0.0026 \pm 0.0002$ |
|            | $1.02 \pm 0.03$                   | $1.9 \pm 0.2$                      | $0.0023 \pm 0.0004$ |
|            | $2.0 \pm 0.1$                     | $2.4 \pm 0.3$                      | $0.0029 \pm 0.0004$ |
|            | $4.4 \pm 0.2$                     | $2.4 \pm 0.2$                      | $0.0041 \pm 0.0002$ |
|            | $9.1 \pm 0.3$                     | $2.2 \pm 0.1$                      | $0.0047 \pm 0.0002$ |
|            | $19.1 \pm 0.9$                    | $2.6 \pm 0.9$                      | $0.0015 \pm 0.0004$ |
| <b>7.0</b> | $0.54 \pm 0.02$                   | $1.8 \pm 0.3$                      | $0.0031 \pm 0.0004$ |
|            | $1.30 \pm 0.04$                   | $2.3 \pm 0.2$                      | $0.0036 \pm 0.0002$ |
|            | $2.4 \pm 0.2$                     | $2.6 \pm 0.2$                      | $0.0039 \pm 0.0004$ |
|            | $5.4 \pm 0.4$                     | $2.5 \pm 0.3$                      | $0.0037 \pm 0.0004$ |
|            | $10.4 \pm 0.3$                    | $2.4 \pm 0.7$                      | $0.0034 \pm 0.0010$ |
|            | $19.8 \pm 0.6$                    | $2.8 \pm 1.0$                      | $0.0016 \pm 0.0002$ |
| <b>7.5</b> | $0.37 \pm 0.04$                   | $2.1 \pm 1.5$                      | $0.0046 \pm 0.0030$ |
|            | $0.77 \pm 0.06$                   | $1.8 \pm 1.3$                      | $0.0027 \pm 0.0020$ |
|            | $1.62 \pm 0.04$                   | $1.5 \pm 1.1$                      | $0.0019 \pm 0.0005$ |
|            | $2.8 \pm 0.2$                     | $2.1 \pm 0.3$                      | $0.0018 \pm 0.0002$ |
|            | $5.4 \pm 0.1$                     | $1.9 \pm 1.4$                      | $0.0020 \pm 0.0008$ |
|            | $9.4 \pm 0.3$                     | $2.3 \pm 2.6$                      | $0.0020 \pm 0.0010$ |
|            | $27 \pm 1$                        | $3.7 \pm 1.5$                      | $0.0016 \pm 0.0008$ |



|            |                 |                 |                     |
|------------|-----------------|-----------------|---------------------|
| <b>8.0</b> | $0.61 \pm 0.04$ | $0.46 \pm 0.1$  | $0.0025 \pm 0.0003$ |
|            | $1.17 \pm 0.03$ | $0.74 \pm 0.4$  | $0.0024 \pm 0.0001$ |
|            | $2.3 \pm 0.1$   | $1.3 \pm 1.0$   | $0.0026 \pm 0.0003$ |
|            | $4.9 \pm 0.1$   | $0.7 \pm 0.2$   | $0.0025 \pm 0.0004$ |
|            | $9.9 \pm 0.3$   | $0.6 \pm 0.4$   | $0.0039 \pm 0.0007$ |
|            | $20.9 \pm 0.6$  | $0.6 \pm 0.1$   | $0.0066 \pm 0.0005$ |
| <b>8.5</b> | $0.57 \pm 0.03$ | $0.40 \pm 0.02$ | $0.0029 \pm 0.0001$ |
|            | $0.92 \pm 0.11$ | $0.4 \pm 0.1$   | $0.0032 \pm 0.0005$ |
|            | $1.6 \pm 0.1$   | $0.34 \pm 0.05$ | $0.0025 \pm 0.0007$ |
|            | $4.0 \pm 0.1$   | $0.4 \pm 0.1$   | $0.0027 \pm 0.0006$ |
|            | $8.4 \pm 0.3$   | $0.35 \pm 0.05$ | $0.0034 \pm 0.0005$ |
|            | $18.2 \pm 0.5$  | $0.5 \pm 0.2$   | $0.0034 \pm 0.0004$ |
| <b>9.0</b> | $0.53 \pm 0.03$ | $0.30 \pm 0.01$ | $0.0066 \pm 0.0003$ |
|            | $1.07 \pm 0.03$ | $0.30 \pm 0.03$ | $0.0057 \pm 0.0010$ |
|            | $2.4 \pm 0.1$   | $0.50 \pm 0.04$ | $0.0054 \pm 0.0004$ |
|            | $5.1 \pm 0.1$   | $0.5 \pm 0.1$   | $0.0055 \pm 0.0007$ |
|            | $10.0 \pm 0.3$  | $0.4 \pm 0.1$   | $0.0069 \pm 0.0030$ |
|            | $20.5 \pm 0.5$  | $0.4 \pm 0.1$   | $0.0098 \pm 0.0020$ |

---

**Table S11.** Slow rate constant,  $k_{\text{obs},4}$ , and its amplitude for the reduction of AcH73 iso-1-cytochrome *c* by  $\text{a}_6\text{Ru}^{2+}$  as a function of pH and  $[\text{a}_6\text{Ru}^{2+}]$  at 25 °C from four exponential fits to the data in Figure S8.

| pH         | $[\text{a}_6\text{Ru}^{2+}]$ , mM | $k_{\text{obs}}$ , $\text{s}^{-1}$ | Amplitude           |
|------------|-----------------------------------|------------------------------------|---------------------|
| <b>5.0</b> | $0.5 \pm 0.1$                     | $0.045 \pm 0.001$                  | $0.0054 \pm 0.0001$ |
|            | $1.2 \pm 0.1$                     | $0.038 \pm 0.002$                  | $0.0050 \pm 0.0001$ |
|            | $1.5 \pm 0.1$                     | $0.057 \pm 0.001$                  | $0.0053 \pm 0.0001$ |
|            | $3.6 \pm 0.4$                     | $0.062 \pm 0.002$                  | $0.0052 \pm 0.0003$ |
|            | $9.0 \pm 0.4$                     | $0.062 \pm 0.004$                  | $0.0036 \pm 0.0002$ |
|            | $20.4 \pm 0.8$                    | $0.067 \pm 0.004$                  | $0.0043 \pm 0.0005$ |
| <b>5.5</b> | $0.7 \pm 0.1$                     | $0.054 \pm 0.002$                  | $0.0069 \pm 0.0001$ |
|            | $1.1 \pm 0.1$                     | $0.045 \pm 0.001$                  | $0.0064 \pm 0.0003$ |
|            | $2.1 \pm 0.1$                     | $0.061 \pm 0.001$                  | $0.0072 \pm 0.0001$ |
|            | $4.2 \pm 0.2$                     | $0.053 \pm 0.001$                  | $0.0064 \pm 0.0002$ |
|            | $8.7 \pm 0.3$                     | $0.064 \pm 0.001$                  | $0.0068 \pm 0.0003$ |
|            | $17.5 \pm 0.7$                    | $0.058 \pm 0.003$                  | $0.0099 \pm 0.0004$ |
| <b>6.0</b> | $0.6 \pm 0.1$                     | $0.062 \pm 0.001$                  | $0.0082 \pm 0.0001$ |
|            | $1.1 \pm 0.1$                     | $0.059 \pm 0.003$                  | $0.0079 \pm 0.0001$ |
|            | $2.5 \pm 0.1$                     | $0.058 \pm 0.001$                  | $0.0076 \pm 0.0001$ |
|            | $5.3 \pm 0.1$                     | $0.054 \pm 0.001$                  | $0.0067 \pm 0.0001$ |
|            | $8.3 \pm 0.3$                     | $0.069 \pm 0.002$                  | $0.0070 \pm 0.0002$ |
|            | $18.4 \pm 0.4$                    | $0.066 \pm 0.005$                  | $0.0053 \pm 0.0005$ |
| <b>6.5</b> | $0.52 \pm 0.02$                   | $0.066 \pm 0.001$                  | $0.0110 \pm 0.0001$ |
|            | $1.02 \pm 0.03$                   | $0.067 \pm 0.001$                  | $0.0110 \pm 0.0001$ |
|            | $2.0 \pm 0.1$                     | $0.066 \pm 0.001$                  | $0.0110 \pm 0.0001$ |
|            | $4.4 \pm 0.2$                     | $0.061 \pm 0.001$                  | $0.0095 \pm 0.0001$ |
|            | $9.1 \pm 0.3$                     | $0.063 \pm 0.001$                  | $0.0085 \pm 0.0002$ |
|            | $19.1 \pm 0.9$                    | $0.076 \pm 0.001$                  | $0.0095 \pm 0.0002$ |
| <b>7.0</b> | $0.54 \pm 0.02$                   | $0.068 \pm 0.002$                  | $0.0145 \pm 0.0001$ |
|            | $1.30 \pm 0.04$                   | $0.066 \pm 0.001$                  | $0.0145 \pm 0.0001$ |
|            | $2.4 \pm 0.2$                     | $0.0630 \pm 0.0002$                | $0.0148 \pm 0.0002$ |
|            | $5.4 \pm 0.4$                     | $0.059 \pm 0.001$                  | $0.0156 \pm 0.0002$ |
|            | $10.4 \pm 0.3$                    | $0.057 \pm 0.002$                  | $0.0182 \pm 0.0003$ |
|            | $19.8 \pm 0.6$                    | $0.039 \pm 0.006$                  | $0.018 \pm 0.003$   |
| <b>7.5</b> | $0.37 \pm 0.04$                   | $0.071 \pm 0.004$                  | $0.0165 \pm 0.0008$ |
|            | $0.77 \pm 0.06$                   | $0.073 \pm 0.002$                  | $0.0169 \pm 0.0002$ |
|            | $1.62 \pm 0.04$                   | $0.071 \pm 0.003$                  | $0.0167 \pm 0.0003$ |
|            | $2.8 \pm 0.2$                     | $0.072 \pm 0.001$                  | $0.0166 \pm 0.0007$ |
|            | $5.4 \pm 0.1$                     | $0.069 \pm 0.003$                  | $0.0164 \pm 0.0007$ |
|            | $9.4 \pm 0.3$                     | $0.065 \pm 0.003$                  | $0.0167 \pm 0.0003$ |
|            | $27 \pm 1$                        | $0.068 \pm 0.007$                  | $0.0132 \pm 0.0008$ |

|            |                 |                     |                     |
|------------|-----------------|---------------------|---------------------|
| <b>8.0</b> | $0.61 \pm 0.04$ | $0.0730 \pm 0.0004$ | $0.0289 \pm 0.0004$ |
|            | $1.17 \pm 0.03$ | $0.078 \pm 0.003$   | $0.0282 \pm 0.0010$ |
|            | $2.3 \pm 0.1$   | $0.076 \pm 0.001$   | $0.0283 \pm 0.0006$ |
|            | $4.9 \pm 0.1$   | $0.081 \pm 0.002$   | $0.0284 \pm 0.0004$ |
|            | $9.9 \pm 0.3$   | $0.079 \pm 0.001$   | $0.0275 \pm 0.0010$ |
|            | $20.9 \pm 0.6$  | $0.086 \pm 0.005$   | $0.0277 \pm 0.0004$ |
| <b>8.5</b> | $0.57 \pm 0.03$ | $0.074 \pm 0.001$   | $0.0286 \pm 0.0003$ |
|            | $0.92 \pm 0.11$ | $0.074 \pm 0.002$   | $0.0275 \pm 0.0008$ |
|            | $1.6 \pm 0.1$   | $0.077 \pm 0.004$   | $0.0276 \pm 0.0007$ |
|            | $4.0 \pm 0.1$   | $0.077 \pm 0.002$   | $0.0267 \pm 0.0006$ |
|            | $8.4 \pm 0.3$   | $0.078 \pm 0.002$   | $0.0261 \pm 0.0006$ |
|            | $18.2 \pm 0.5$  | $0.088 \pm 0.002$   | $0.0238 \pm 0.0007$ |
| <b>9.0</b> | $0.53 \pm 0.03$ | $0.0760 \pm 0.0003$ | $0.038 \pm 0.001$   |
|            | $1.07 \pm 0.03$ | $0.077 \pm 0.001$   | $0.037 \pm 0.001$   |
|            | $2.4 \pm 0.1$   | $0.086 \pm 0.001$   | $0.038 \pm 0.001$   |
|            | $5.1 \pm 0.1$   | $0.093 \pm 0.003$   | $0.036 \pm 0.001$   |
|            | $10.0 \pm 0.3$  | $0.092 \pm 0.006$   | $0.035 \pm 0.002$   |
|            | $20.5 \pm 0.5$  | $0.10 \pm 0.01$     | $0.033 \pm 0.002$   |

---

**Table S12.**  $k_f$  and  $k_b$ , for the His73-heme alkaline conformational transition of AcH73 iso-1-Cytc at 25 °C derived from fitting  $k_{\text{obs},2}$  data in Table S9 to eq 6 in the main text.

| pH  | $k_b, \text{s}^{-1}$ | $k_f, \text{s}^{-1}$ |
|-----|----------------------|----------------------|
| 5.0 | $29 \pm 1$           | $11.8 \pm 3.4$       |
| 5.5 | $25.5 \pm 1.3$       | $13.7 \pm 5.5$       |
| 6.0 | $22.9 \pm 0.5$       | $17.4 \pm 2.5$       |
| 6.5 | $18.7 \pm 0.2$       | $20.5 \pm 1.1$       |
| 7.0 | $15.2 \pm 0.2$       | $21.6 \pm 1.8$       |
| 7.5 | $14.1 \pm 0.2$       | $27.7 \pm 1.5$       |
| 8.0 | $13.0 \pm 0.1$       | $22.5 \pm 1.3$       |
| 8.5 | $12.5 \pm 0.1$       | $23.1 \pm 1.3$       |
| 9.0 | $12.0 \pm 0.2$       | $26.9 \pm 1.8$       |

**Table S13.**  $k_f$  and  $k_b$ , for AcH73 iso-1-Cytc at 25 °C derived from fitting  $k_{\text{obs},3}$  data in Table S10 to eq 6 in the main text.

| pH  | $k_b, \text{s}^{-1}$ | $k_f, \text{s}^{-1}$ |
|-----|----------------------|----------------------|
| 5.0 | $3.0 \pm 0.3$        | $30 \pm 16$          |
| 5.5 | $3.5 \pm 0.2$        | $75 \pm 19$          |
| 6.0 | $2.8 \pm 0.3$        | $17 \pm 14$          |
| 6.5 | $2.5 \pm 0.1$        | $20 \pm 6$           |
| 7.0 | $2.7 \pm 0.1$        | $16 \pm 5$           |
| 7.5 | $2.5 \pm 0.4$        | $12 \pm 14$          |
| 8.0 | $0.8 \pm 0.2$        | $6 \pm 20$           |
| 8.5 | $0.41 \pm 0.03$      | $2 \pm 6$            |
| 9.0 | $0.45 \pm 0.05$      | $12 \pm 9$           |

**Table S14.**  $k_f$  and  $k_b$ , for AcH73 iso-1-Cytc at 25 °C derived from fitting  $k_{\text{obs},4}$  data in Table S11 to eq 6 in the main text.

| pH  | $k_b, \text{s}^{-1}$ | $k_f, \text{s}^{-1}$ |
|-----|----------------------|----------------------|
| 5.0 | $0.066 \pm 0.005$    | $23 \pm 11$          |
| 5.5 | $0.060 \pm 0.004$    | $9 \pm 8$            |
| 6.0 | $0.062 \pm 0.004$    | $1 \pm 5$            |
| 6.5 | $0.067 \pm 0.003$    | $1 \pm 3$            |
| 7.0 | $0.059 \pm 0.006$    | $0 \pm 9$            |
| 7.5 | $0.070 \pm 0.002$    | $0 \pm 1$            |
| 8.0 | $0.082 \pm 0.002$    | $4 \pm 2$            |
| 8.5 | $0.082 \pm 0.003$    | $4 \pm 2$            |
| 9.0 | $0.096 \pm 0.003$    | $8 \pm 2$            |

#### D. Numerical Fitting of Gated ET Data

The steady-state approximation used to fit the  $k_{\text{obs}}$  versus  $\text{a}_6\text{Ru}^{2+}$  concentration data for the reduction of the His73-heme conformer of the AcH73 in Figure 8 of the main text (eq 6 in the main text, repeated here as eq S1) is only a good approximation when  $k_{\text{ET}}[\text{a}_6\text{Ru}^{2+}] + k_f \gg k_b$  (1).

$$(S1) \quad k_{\text{obs}} = \frac{k_{\text{ET}}k_b[\text{a}_6\text{Ru}^{2+}]}{k_{\text{ET}}[\text{a}_6\text{Ru}^{2+}] + k_f}$$

Thus, the steady-state approximation breaks down at low  $\text{a}_6\text{Ru}^{2+}$  concentration when  $k_{\text{ET}}[\text{a}_6\text{Ru}^{2+}]$  approaches  $100 \text{ s}^{-1}$ . In Table S8,  $k_{\text{obs},1} = k_{\text{ET}}[\text{a}_6\text{Ru}^{2+}]$  approaches  $100 \text{ s}^{-1}$  for concentrations of  $\text{a}_6\text{Ru}^{2+} < 2 \text{ mM}$ . Thus, the breakdown in the steady-state approximation is most prominent in a range of concentration critical for evaluating  $k_f$  with eq S1. Deviations from steady state-behavior are expected to be largest at low pH where  $k_b$  is largest and  $k_f$  is smallest.

The improved steady-state approximation which accounts for the fact that the concentration of the intermediate (Met80-heme conformer or native state of iso-1-Cyt<sub>c</sub> in our system) is not truly independent of time. For our system the improved state approximation yields eq S2 (1). In

$$(S2) \quad k_{\text{obs}} = \frac{k_{\text{ET}}k_b[\text{a}_6\text{Ru}^{2+}]}{k_{\text{ET}}[\text{a}_6\text{Ru}^{2+}] + k_f + k_b}$$

the low pH range, application of eq S2 to the data in Figure 8 of the main text yields physically unreasonable  $k_f$  values of negative magnitude. When  $k_{\text{ET}}[\text{a}_6\text{Ru}^{2+}]$  approaches the magnitude of  $k_f$  and  $k_b$ , modeling results with the exact solution to the kinetic model involving a reversible equilibrium followed by an irreversible step show that both eqs S1 and S2 become poor approximations (1). Since  $k_{\text{obs},2}$  reported in Table S9 is expected to decrease faster than

predicted by the steady state approximation at low  $a_6\text{Ru}^{2+}$  concentration, the steady state approximation will tend to overestimate  $k_f(I)$ . By contrast, since  $k_{\text{obs},2}$  is expected to decrease less rapidly than predicted by the improved steady-state approximation, the improved steady-

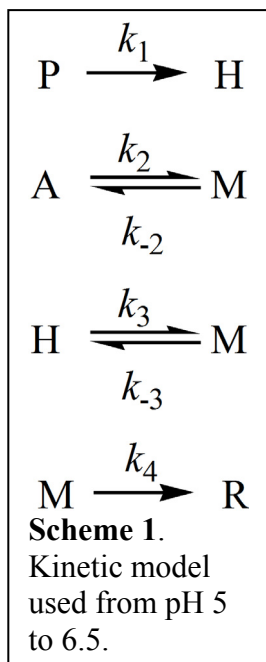

state approximation will tend to underestimate  $k_f$ . It is worth noting that the exact expression for the kinetic model involving a reversible equilibrium followed by an irreversible step was derived assuming all species are at zero concentration except the species on the left of the reversible step (His73-heme conformer in our case). This assumption is not fulfilled by our system because all species are present at finite concentrations at the start of the reduction reaction. Thus, we have used numerical fitting of data near 1 mM  $a_6\text{Ru}^{2+}$ , where the steady-state approximation has clearly broken down to estimate  $k_f$  for the formation of the His73-heme conformer from the Met80-heme conformer of the AcH73 variant of iso-1-Cytc.

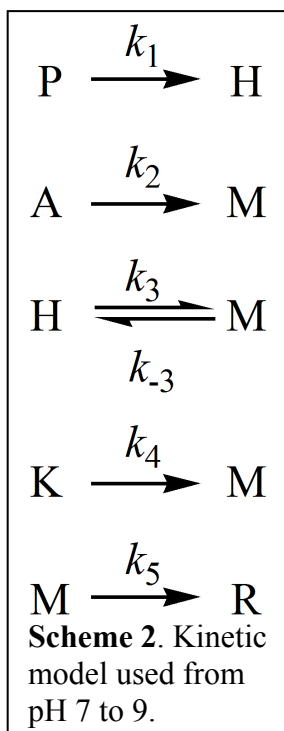

Numerical fitting was carried out using Pro-Kineticist software, version 1 (Applied Photophysics, Inc.). Five separate data trials were fit at each pH using data acquired over a 50 s time scale. Thus, all four phases were included in the fit. Rate constants obtained from these fits are reported as the average and standard deviation of the five fits at each pH. Two different kinetic models are used as outlined in Schemes S1 and S2, where P is the His73-heme conformer with a cis-proline, H is the His73-heme conformer with the native trans-proline, A is an acid conformer in the low pH regime and an undefined conformer above pH

6.5, K is the Lys79-heme alkaline conformer, M is the native oxidized Met80-heme conformer and R is the reduced Met 80-heme conformer.

The following rate constant constraints were used in numerical fitting. The magnitude of  $k_1$  was set equal to the limiting value of  $k_{\text{obs},4}$  (see Figure S12) obtained at high  $\text{a}_6\text{Ru}^{2+}$  concentration (Table S14). Above pH 7,  $k_1$  was constrained to 0.06 since  $k_{\text{obs},4}$  begins to increase due to contributions from the reduction of the Lys79-heme conformer to this kinetic phase.  $k_4$ , the rate constant for conversion of the Lys79-heme conformer (K) to the Met80-heme conformer (M) in Scheme S2 was not constrained. The magnitude of  $k_2$  was set equal to the limiting value of  $k_{\text{obs},3}$  (see Figure S11) obtained at high  $\text{a}_6\text{Ru}^{2+}$  concentration (Table S13).  $k_2$  was not constrained at pH 5 to 6. At pH 6.5,  $k_2$  produced values of zero within error and so it was set to zero in some fits. The magnitude of  $k_3$  was set equal to the limiting value of  $k_{\text{obs},2}$  (see Figure 8, Main text) obtained at high  $\text{a}_6\text{Ru}^{2+}$  concentration (Table S12).  $k_3$  was not constrained (this rate constant corresponds to  $k_{\text{f,num}}$  in Figure 8 of the main text). The electron transfer rate constant ( $k_4$  below pH 7 and  $k_5$  pH 7 and above) was not constrained.

Rate constants from numerical fitting are sensitive to starting concentrations of species used in the model. To obtain total concentration we divided the amplitude at the lowest  $\text{a}_6\text{Ru}^{2+}$  concentration by the difference in the reduced versus oxidized extinction coefficient at 550 nm ( $19,000 \text{ M}^{-1}\text{cm}^{-1}$ , *ref.* 2). Electron transfer is slow under these conditions and thus the entire amplitude is observed. The amplitude for each phase of the  $\sim 5 \text{ mM}$   $\text{a}_6\text{Ru}^{2+}$  trial ( $\sim 5 \text{ mM}$  was chosen because steady-state conditions apply and amplitudes reflect starting concentrations of species in solution) was divided by the total amplitude at the lowest  $\text{a}_6\text{Ru}^{2+}$  concentration. The resulting fractional amplitude was multiplied by the total concentration to produce starting concentrations from P, H, A and M, with the assumption that any decrease in total amplitude for



the  $\sim 5$  mM  $\text{a}_6\text{Ru}^{2+}$  data relative to the lowest  $\text{a}_6\text{Ru}^{2+}$  concentration data was due to rapid reduction of M. At pH 7 and above, the ratio of P/H was assumed to remain constant with the remaining amplitude of the slowest phase being attributed to K. The extinction coefficient at 550 nm for M was constrained to  $9000 \text{ M}^{-1} \text{ cm}^{-1}$ , the known extinction coefficient for oxidized cytochrome *c* at this wavelength (2). The extinction coefficient for P (His73-heme with a cis-proline) was constrained to  $9000 \text{ M}^{-1} \text{ cm}^{-1}$  for fits to the mechanism in Scheme 2 because it took on negative values when unconstrained. Within error, this additional constraint did not affect rate constants obtained from numerical fitting. The fitted value for the extinction coefficient for R at 550 nm was always near  $28,000 \text{ M}^{-1} \text{ cm}^{-1}$ , the known extinction coefficient for reduced cytochrome *c* at 550 nm (2). The rate constants obtained from numerical fitting are provided in Tables S15 and S16. Values from fits assuming a steady state approximation are included in Tables S15 and S16 for comparison. Representative fits to the data along with concentration profiles are shown in Figures S13 and S14.

**Table S15.** Rate constants from numerical fitting of gated ET data at  $\sim 1$  mM  $\text{a}_6\text{Ru}^{2+}$  concentration for reduction of the AcH73 variant of iso-1-Cytc at pH 5 to 6.5.

| pH  | $[\text{a}_6\text{Ru}^{2+}]$<br>mM | $k_{-2}$   |                           | $k_{-3}$       |                           | $k_4$      |                                  |
|-----|------------------------------------|------------|---------------------------|----------------|---------------------------|------------|----------------------------------|
|     |                                    | Numerical  | Steady state <sup>a</sup> | Numerical      | Steady state <sup>b</sup> | Numerical  | Exponential fitting <sup>c</sup> |
| 5.0 | $1.1 \pm 0.1$                      | $20 \pm 3$ | $30 \pm 16$               | $6.4 \pm 0.6$  | $11.8 \pm 3.4$            | $74 \pm 4$ | $102 \pm 2$                      |
| 5.5 | $1.1 \pm 0.1$                      | $42 \pm 1$ | $75 \pm 19$               | $5.9 \pm 0.6$  | $13.7 \pm 5.5$            | $54 \pm 2$ | $102 \pm 2$                      |
| 6.0 | $1.1 \pm 0.1$                      | $10 \pm 8$ | $17 \pm 14$               | $13.8 \pm 0.8$ | $17.4 \pm 2.5$            | $73 \pm 8$ | $99 \pm 7$                       |
| 6.5 | $1.02 \pm 0.03$                    | $\sim 0$   | $20 \pm 6$                | $20.4 \pm 0.4$ | $20.5 \pm 1.1$            | $88 \pm 1$ | $113 \pm 3$                      |

<sup>a</sup> $k_f$  values from Table S13.

<sup>b</sup> $k_f$  values from Table S12.

<sup>c</sup> $k_{\text{obs},1}$  values at  $\sim 1$  mM from Table S8.

From pH 5 to 6.5, the rate constant for the formation of the His73-heme conformer from the native state (Met80-heme conformer,  $k_{-3}$  in Table S15) from numerical fitting is lower than the values obtained from the steady state approximation. This result is expected based on the direction of deviation in  $k_{\text{obs},2}$  from the value expected for the steady state approximation. The intermediate (M, Met80-heme conformer) is highly populated at low pH, thus the deviation from steady-state behavior is expected to be largest. As expected, the electron transfer rate constant ( $k_4$  in Table S15) is less than observed from directly fitting the exponential decay of the fast phase (*I*).

**Table S16.** Rate constants from numerical fitting of gated ET data at  $\sim 1$  mM  $\text{a}_6\text{Ru}^{2+}$  concentration for reduction of the Ach73 variant of iso-1-Cytc at pH 7 to 9.

| pH  | $[\text{a}_6\text{Ru}^{2+}]$<br>mM | $k_{-3}$       |                           | $k_4$             |                           | $k_5$       |                     |
|-----|------------------------------------|----------------|---------------------------|-------------------|---------------------------|-------------|---------------------|
|     |                                    | Numerical      | Steady state <sup>a</sup> | Numerical         | Steady state <sup>b</sup> | Numerical   | Exponential fitting |
| 7.0 | $1.30 \pm 0.04$                    | $17.1 \pm 1.0$ | $21.6 \pm 1.8$            | $0.078 \pm 0.002$ | $0.059 \pm 0.006$         | $112 \pm 2$ | $113 \pm 3$         |
| 7.5 | $0.77 \pm 0.06$                    | $28.5 \pm 1.9$ | $27.7 \pm 1.5$            | $0.089 \pm 0.001$ | $0.070 \pm 0.002$         | $65 \pm 4$  | $68 \pm 8$          |
| 8.0 | $1.17 \pm 0.03$                    | $31.4 \pm 2.5$ | $22.5 \pm 1.3$            | $0.084 \pm 0.002$ | $0.082 \pm 0.002$         | $104 \pm 7$ | $106 \pm 5$         |
| 8.5 | $0.9 \pm 0.1$                      | $23.9 \pm 1.0$ | $23.1 \pm 1.3$            | $0.081 \pm 0.001$ | $0.082 \pm 0.002$         | $64 \pm 2$  | $96 \pm 10$         |
| 9.5 | $1.07 \pm 0.03$                    | $22.8 \pm 3.2$ | $26.9 \pm 1.8$            | $0.085 \pm 0.001$ | $0.096 \pm 0.003$         | $46 \pm 3$  | $80 \pm 12$         |

<sup>a</sup> $k_{\text{f}}$  values from Table S12.  
<sup>b</sup> $k_{\text{b}}$  values from Table S14.  
<sup>c</sup> $k_{\text{obs},1}$  values at  $\sim 1$  mM from Table S8.

From pH 7 to 9, where the intermediate (M, Met80-heme) is poorly populated, the agreement of the rate constant for formation of the His73-heme conformer from the native state (Met80-

heme conformer,  $k_{-3}$  in Table S16) obtained from the steady-state approximation and from numerical methods is better.

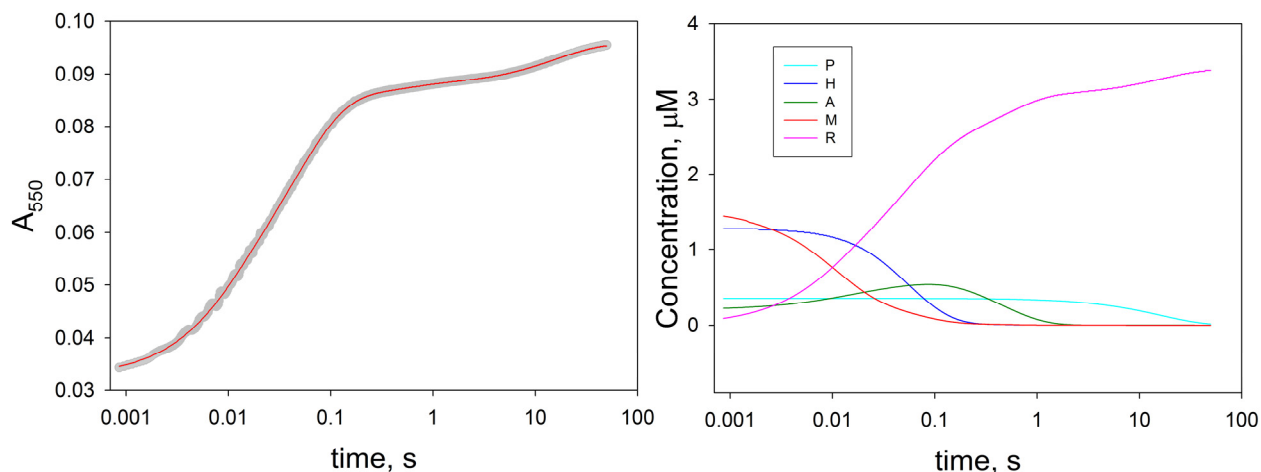

**Figure S13.** Numerical fit to data at pH 6 for reduction of the ACh73 variant of iso-1-Cytc by 1 mM  $a_6Ru^{2+}$ . Left panel shows absorbance at 550 nm,  $A_{550}$ , versus time with data shown as gray circles and the fit as a red line. Right panel is the time dependent concentrations of the species in Scheme S1 obtained from the fit. The time axis in both panels is plotted logarithmically.

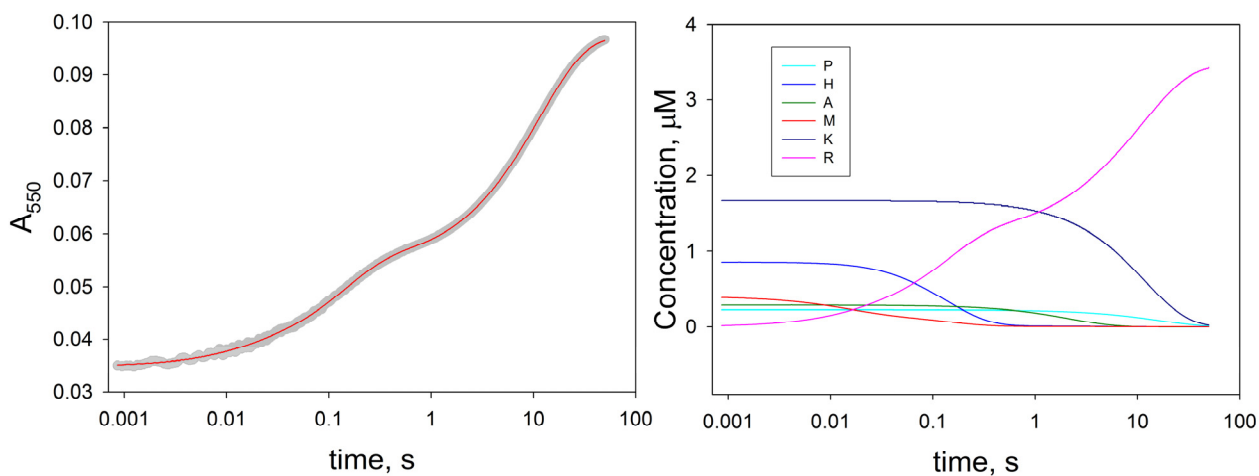

**Figure S14.** Numerical fit to data at pH 9 for reduction of the ACh73 variant of iso-1-Cytc by 1.07 mM  $a_6Ru^{2+}$ . Left panel shows absorbance at 550 nm,  $A_{550}$ , versus time with data shown as gray circles and the fit as a red line. Right panel is the time dependent concentrations of the species in Scheme S2 obtained from the fit. The time axis in both panels is plotted logarithmically.

## References

1. Espenson, J. H. (1995) *Chemical Kinetics and Reaction Mechanisms*, 2<sup>nd</sup> edition, pp. 77-90, McGraw-Hill, New York.
2. Margoliash, E., and Frohwirt, N. (1959) Spectrum of horse-heart cytochrome *c*, *Biochem. J.* *71*, 570-572.
